# Supplementary material
Source: publisher site journal article supplement (https://www.dovepress.com/article/493398)
Supplement: Supplementary file 1 [file get_supplementary_file.php]

**Supplementary table 1** Corrected distance visual acuity pre- and post-operatively

| **Parameter,**  **mean/geometric mean ± SD** | **Hydrophilic**  **IOL** | **Hydrophobic**  **IOL** | **p-valuea** |
| --- | --- | --- | --- |
| **Preoperatively** |  |  |  |
| All, n (eyes) = 89 |  |  |  |
| LogMAR | 0.39 ± 0.36 | 0.37 ± 0.36 | 0.81 |
| Snellen decimal | 0.41 | 0.43 |  |
| Uveitis, n (eyes) = 51 |  |  |  |
| LogMAR | 0.48 ± 0.42 | 0.39 ± 0.46 | 0.45 |
| Snellen decimal | 0.33 | 0.41 |  |
| No uveitis, n (eyes) = 38 |  |  |  |
| LogMAR | 0.25 ± 0.18 | 0.35 ± 0.18 | 0.09 |
| Snellen decimal | 0.56 | 0.45 |  |
| **Two weeks postoperatively** |  |  |  |
| All, n (eyes) = 88 |  |  |  |
| LogMAR | 0.07 ± 0.16 | 0.08 ± 020 | 0.62 |
| Snellen decimal | 0.85 | 0.83 |  |
| Uveitis, n (eyes) = 50 |  |  |  |
| LogMAR | 0.06 ± 0.18 | 0.12 ± 0.23 | 0.38 |
| Snellen decimal | 0.87 | 0.76 |  |
| No uveitis, n (eyes) = 38 |  |  |  |
| LogMAR | 0.07 ± 0.12 | 0.05 ± 0.15 | 0.68 |
| Snellen decimal | 0.85 | 0.76 |  |
| **Six months postoperatively** |  |  |  |
| All, n (eyes) = 84 |  |  |  |
| LogMAR | 0.07 ± 0.14 | 0.07 ± 0.18 | 0.95 |
| Snellen decimal | 0.85 | 0.89 |  |
| Uveitis, n (eyes) = 48 |  |  |  |
| LogMAR | 0.09 ± 0.17 | 0.08 ± 0.23 | 0.88 |
| Snellen decimal | 0.81 | 0.83 |  |
| No uveitis, n (eyes) = 36 |  |  |  |
| LogMAR | 0.03 ± 0.07 | 0.06 ± 0.11 | 0.45 |
| Snellen decimal | 0.93 | 0.87 |  |

**Notes:** a Independent samples t-test

**Abbreviations:** LogMAR = Logarithm of the Minimum Angle of Resolution.

**Supplementary table 2** SUN grading pre- and post-operatively

| **Parameter,**  **SUN grading** | **Hydrophilic**  **IOL**  Median (range) | **Hydrophobic**  **IOL**  Median (range) | **p-valuea**  Mann-Whitney test |
| --- | --- | --- | --- |
| **Preoperatively** |  |  |  |
| Uveitis |  |  |  |
| Flare | 0.0 (0.0-2.0) | 0.0 (0.0-2.0) | 0.34 |
| Cells | 0.0 (0.0-3.0) | 0.0 (0.0-0.5) | 0.95 |
| Vitreous cells | 0.0 (0.0-1.0) | 0.0 (0.0-1.0) | >0.99 |
| No uveitis |  |  |  |
| Flare | 0.0 (0.0-1.0) | 0.0 (0.0-1.0) | 0.76 |
| Cells | 0.0 (0.0-2.0) | 0.0 (0.0-2.0) | 0.76 |
| Vitreous cells | 0.0 (0.0-0.0) | 0.0 (0.0-0.0) | >0.99 |
| **Day one** |  |  |  |
| Uveitis |  |  |  |
| Flare | 1.0 (0.0-4.0) | 1.0 (1.0-4.0) | 0.96 |
| Cells | 2.0 (0.5-4.0) | 2.0 (1.0-4.0) | 0.36 |
| Vitreous cells | 0.0 (0.0-2.0) | 0.0 (0.0-1.0) | 0.93 |
| **Day five** |  |  |  |
| Uveitis |  |  |  |
| Flare | 1.0 (0.0-2.0) | 1.0 (1.0-1.0) | 0.10 |
| Cells | 0.5 (0.0-2.0) | 0.5 (0.0-2.0) | 0.36 |
| Vitreous cells | 0.0 (0.0-2.0) | 0.0 (0.0-1.0) | 0.68 |
| **Two weeks postoperatively** |  |  |  |
| Uveitis |  |  |  |
| Flare | 1.0 (0.0-2.0) | 1.0 (0.0-2.0) | 0.76 |
| Cells | 0.5 (0.0-1.0) | 0.5 (0.5-3.0) | 0.64 |
| Vitreous cells | 0.0 (0.0-2.0) | 0.0 (0.0-2.0) | 0.11 |
| No uveitis |  |  |  |
| Flare | 0.0 (0.0-1.0) | 0.0 (0.0-1.0) | 0.32 |
| Cells | 0.0 (0.0-0.5) | 0.3 (0.0-2.0) | 0.07 |
| Vitreous cells | 0.0 (0.0-0.0) | 0.0 (0.0-1.0) | 0.60 |
| **Six months postoperatively** |  |  |  |
| Uveitis |  |  |  |
| Flare | 0.0 (0.0-2.0) | 0.0 (0.0-1.0) | 0.60 |
| Cells | 0.0 (0.0-1.0) | 0.0 (0.0-2.0) | 0.22 |
| Vitreous cells | 0.0 (0.0-2.0) | 0.0 (0.0-1.0) | >0.99 |
| No uveitis |  |  |  |
| Flare | 0.0 (0.0-0.0) | 0.0 (0.0-1.0) | 0.63 |
| Cells | 0.0 (0.0-0.0) | 0.0 (0.0-0.5) | 0.81 |
| Vitreous cells | 0.0 (0.0-0.0) | 0.0 (0.0-0.0) | >0.99 |

**Abbreviations:** SUN = Standardization of Uveitis Nomenclature
